# Supplementary material for: Organic solar cells with near-unity charge generation yield
Source: Royal Society of Chemistry journal article supplement (doi:10.1039/d1ee01367j), 2021-01-01
Supplement: d1ee01367j1.pdf [file d1ee01367j1.pdf]

Supporting Information

## Organic Solar Cells with Near-unity Charge Generation Yield

Wei Li\*, Stefan Zeiske, Oskar J. Sandberg\*, Drew B. Riley, Paul Meredith & Ardalan Armin\*

Sustainable Advanced Materials (Sêr SAM), Department of Physics, Swansea University  
Singleton Park, Swansea SA2 8PP, UK

Email: [ardalan.armin@swansea.ac.uk](mailto:ardalan.armin@swansea.ac.uk); [o.j.sandberg@swansea.ac.uk](mailto:o.j.sandberg@swansea.ac.uk); [wei.li@swansea.ac.uk](mailto:wei.li@swansea.ac.uk);

### Device fabrication:

**Chemical definitions:** Poly(3,4-ethylenedioxythiophene) polystyrene sulfonate (PEDOT:PSS); poly[(2,6-(4,8-bis(5-(2-ethylhexyl-3-fluoro)thiophen-2-yl)-benzo[1,2-b:4,5-b']dithiophene))-alt-(5,5-(1',3'-di-2-thienyl-5',7'-bis(2-ethylhexyl)benzo[1',2'-c:4',5'-c']dithiophene-4,8-dione)] (PM6); 2,2'-((2Z,2'Z)-((12,13-bis(2-ethylhexyl)-3,9-diundecyl-12,13-dihydro-[1,2,5]thiadiazolo[3,4-e]thieno[2'',3'':4',5']thieno[2',3':4,5]pyrrolo[3,2-g]thieno[2',3':4,5]thieno[3,2-b]indole-2,10-diyl)bis(methanylylidene))bis(5,6-difluoro-3-oxo-2,3-dihydro-1H-indene-2,1-diylidene))dimalononitrile (Y6); 2,2'- [[12,13-Bis(2-butyloctyl)-12,13-dihydro-3,9-dinonylbisthieno[2'',3'':4',5']thieno[2',3':4,5]pyrrolo[3,2-e:2',3'-g][2,1,3]benzothiadiazole-2,10-diyl]bis[methylydyne(5,6-chloro-3-oxo-1H-indene-2,1(3H)-diylidene) ]]bis[propanedinitrile](BTP-eC9); 3,9-bis(2-methylene-(3-(1,1-dicyanomethylene)-indanone))-5,5,11,11-tetrakis(4-hexylphenyl)-dithieno[2,3-d:2',3'-d']-s-indaceno[1,2-b:5,6-b']dithiophene (ITIC); (5Z)-3-ethyl-2-sulfanylidene-5-[[4-[9,9,18,18-tetrakis(2-ethylhexyl)-15-[7-[(Z)-(3-ethyl-4-oxo-2-sulfanylidene-1,3-thiazolidin-5-ylidene)methyl]-2,1,3-benzothiadiazol-4-yl]-5,14-dithiapentacyclo[10.6.0.03,10.04,8.013,17]octadeca-1(12),2,4(8),6,10,13(17),15-heptaen-6-yl]-2,1,3-benzothiadiazol-7-yl]methylidene]-1,3-thiazolidin-4-one (EH-IDTBR); 2,9-Bis[3-(dimethyloxidoamino)propyl]anthra[2,1,9-def:6,5,10-d'e'f']diisoquinoline-1,3,8,10(2H,9H)-tetrone (PDINO).

**Materials:** PEDOT: PSS was purchased from Heraeus. PM6, Y6, BTP-eC9, EH-IDTBR, and PDINO were purchased from Solarmer. PBDB-T, and ITIC were purchased from Nanjing Zhiyan. ITO was purchased from the Kintec Company.

**Substrate preparation:** Commercial patterned ITO coated glass substrates were cleaned in deionized (DI) water, acetone and 2-propanol by sequential sonication for 10 minutes. The cleaned substrates were first dried by nitrogen and then baked on hotplate at 110 °C for 10 minutes. Afterwards, the substrates were treated in a UV-Ozone cleaner (Ossila, L2002A2-UK) for 20 minutes before the deposition of hole transport and electron transport layers.

**PBDB-T:EH-IDTBR:** PBDB-T: EH-IDTBR devices were fabricated with an inverted structure (ITO/ZnO/PBDB-T: EH-IDTBR /MoO<sub>3</sub>/Ag). A ZnO solution was prepared by dissolving 200 mg of zinc acetate dihydrate in 2-methoxyethanol (2ml) and ethanolamine (56µl). The solution was stirred overnight under ambient conditions and spin-coated onto ITO substrates (4000 rpm resulting in a thickness of approximately 30 nm) followed by thermal annealing at 200 °C for 60 minutes. PBDB-T: EH-IDTBR was dissolved in a (99.5:0.5) CB:DIO solution with a donor: acceptor ratio of 1:1 by weight. The thicknesses of PBDB-T:EH-IDTBR films were adjusted by changing the concentration of the solution and spin-coating speed (40 mg ml<sup>-1</sup> CB:DIO solution with 700 rpm for 310 nm films, 35 mg ml<sup>-1</sup> CB:DIO solution with 700 rpm for 270 nm films, 30 mg ml<sup>-1</sup> CB:DIO solution with 700 rpm for 200 nm films, 24 mg ml<sup>-1</sup> CB:DIO solution with 700 rpm for 170 nm films, 14 mg ml<sup>-1</sup> CB:DIO solution with 700 rpm for 90 nm films, 10 mg ml<sup>-1</sup> CB:DIO solution with 700 rpm for 50 nm films). The active layers were further treated with thermal annealing at 100 °C for 10 minutes. Afterwards, 7 nm of MoO<sub>3</sub> and 100 nm of Ag were evaporated as the top electrode.

**PM6:ITIC:** PM6:ITIC devices were fabricated with a conventional device structure (ITO/PEDOT:PSS/PM6:ITIC/PDINO/Ag). PEDOT: PSS solution was first diluted with the same volume of water and then cast at 4000 rpm on ITO substrates followed by thermal annealing at 155 °C for 15 min to form a 10 nm film. PM6: ITIC was dissolved in a (99.5:0.5) CF:DIO solution with a donor: acceptor ratio of 1:1 by weight. The thicknesses of PM6:ITIC films were adjusted by changing the concentration of the solution and spin-coating speed (36 mg ml<sup>-1</sup> CF:DIO solution with 2000 rpm for 470 nm films, 32 mg ml<sup>-1</sup> CF:DIO solution with 2000 rpm for 288 nm films, 25 mg ml<sup>-1</sup> CF:DIO solution with 2000 rpm for 180 nm films, 20 mg ml<sup>-1</sup> CF:DIO solution with 3000 rpm for 130 nm films, 14 mg ml<sup>-1</sup> CF:DIO solution with 3000 rpm for 90 nm films, 12 mg ml<sup>-1</sup> CF:DIO solution with 3000 rpm for 60 nm films). The active layers were further thermally annealed at 100 °C for 10 minutes. Afterwards, 1 mg ml<sup>-1</sup> PDINO solution was spin-coated on PM6: ITIC film at 2000 rpm to form 10 nm films, and 100 nm of Ag was evaporated as the top electrode.

**PM6:Y6:** PM6:Y6 devices were fabricated with a conventional structure (ITO/PEDOT:PSS/PM6:Y6/PDINO/Ag). PEDOT:PSS solution was first diluted with the same volume of water and then cast at 4000 rpm on ITO substrates followed by thermal annealing at 155 °C for 15 min to form a 10 nm film. PM6:Y6 was dissolved in a CF:CN (99.5:0.5) solution with a donor: acceptor ratio of 1:1.2 by weight. The thicknesses of PM6:Y6 films were adjusted by changing the concentration of the solution and the spin-coating speed (40 mg ml<sup>-1</sup> CF:CN solution with 4000 rpm for 390 nm, 35 mg ml<sup>-1</sup> CF:DIO solution with 4000 rpm for 310 nm, 30 mg ml<sup>-1</sup> CF:DIO solution with 4000 rpm for 260 nm, 25 mg ml<sup>-1</sup> CF:DIO solution with 4000 rpm for 190 nm, 20 mg ml<sup>-1</sup> CF:DIO solution with 4000 rpm for 160 nm, 16 mg ml<sup>-1</sup> CF:DIO solution with 2000 rpm for 109 nm, 5 mg ml<sup>-1</sup> CF:DIO solution with 2000 rpm for 30 nm). The active layers were further thermally annealed at 100 °C for 10 minutes. Afterwards, 1 mg ml<sup>-1</sup> PDINO solution was spin-coated on PM6:Y6 films at 2000 rpm to form 10 nm films, and 100 nm of Ag was evaporated as the top electrode.

**PM6:BTP-eC9:** PM6:BTP-eC9 devices were fabricated with a conventional structure (ITO/PEDOT:PSS/PM6:BTP-eC9/PDINO/Ag). PEDOT:PSS solution was first diluted with the same volume of water and then cast at 4000 rpm on ITO substrate and followed by thermal annealing at 155 °C for 15 min to form a 10 nm film. PM6:BTP-eC9 was dissolved in a CF:DIO (99.5:0.5) solution with a donor: acceptor ratio of 1:1.2 by weight. The thicknesses of PM6:BTP-eC9 films were adjusted by changing the concentration of the solution and the spin-coating speed (40 mg ml<sup>-1</sup> CF:DIO solution with 2000 rpm for 446 nm, 35 mg ml<sup>-1</sup> CF:DIO solution with 2000 rpm for 340 nm, 30 mg ml<sup>-1</sup> CF:DIO solution with 2000 rpm for 293 nm, 25 mg ml<sup>-1</sup> CF:DIO solution with 2000 rpm for 260 nm, 23 mg ml<sup>-1</sup> CF:DIO solution with 3000 rpm for 200 nm, 20 mg ml<sup>-1</sup> CF:DIO solution with 2000 rpm for 160 nm, 16 mg ml<sup>-1</sup> CF:DIO solution with 3000 rpm for 90 nm, 12 mg ml<sup>-1</sup> CF:DIO solution with 3000 rpm for 60 nm). Afterwards, 1 mg ml<sup>-1</sup> PDINO solution was spin-coated on PM6: BTP-eC9 film at 2000 rpm to form 10 nm films, and 100 nm of Ag was evaporated as the top electrode. The thicknesses of all the above films are measured by ellipsometry.

**Figures:**

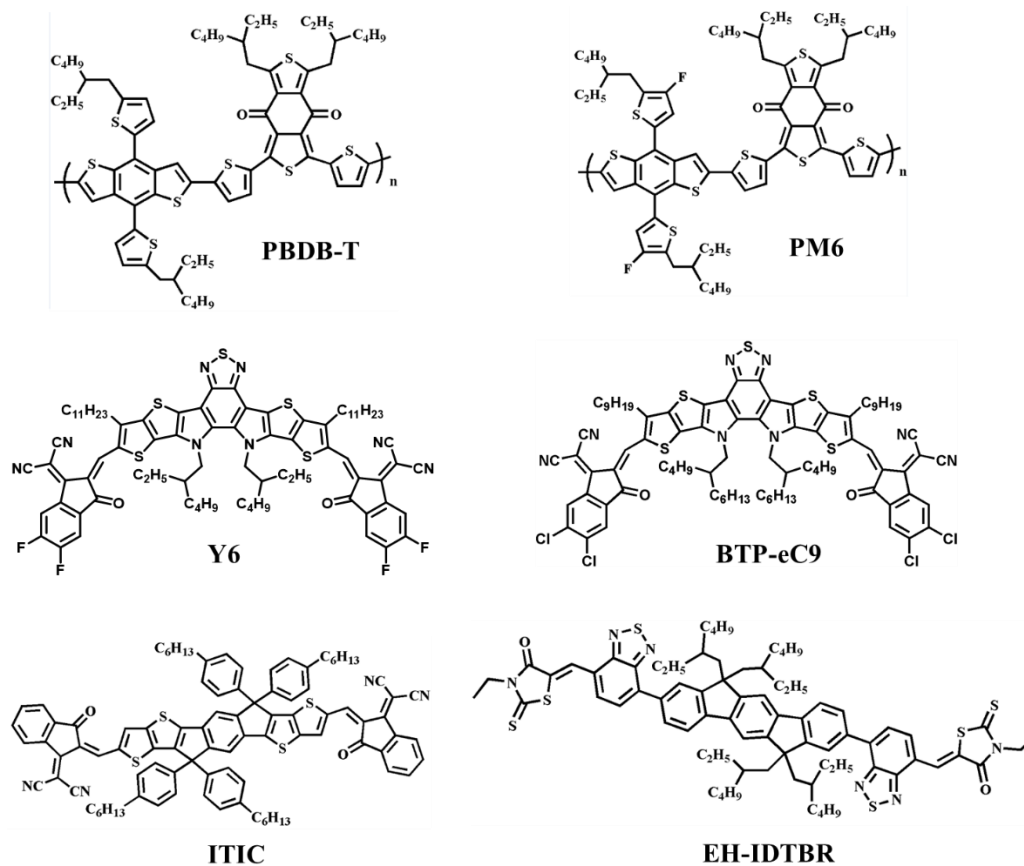

**Figure S1** Chemical structures of PBDB-T, PM6, Y6, BTP-eC9, ITIC and EH-IDTBR.

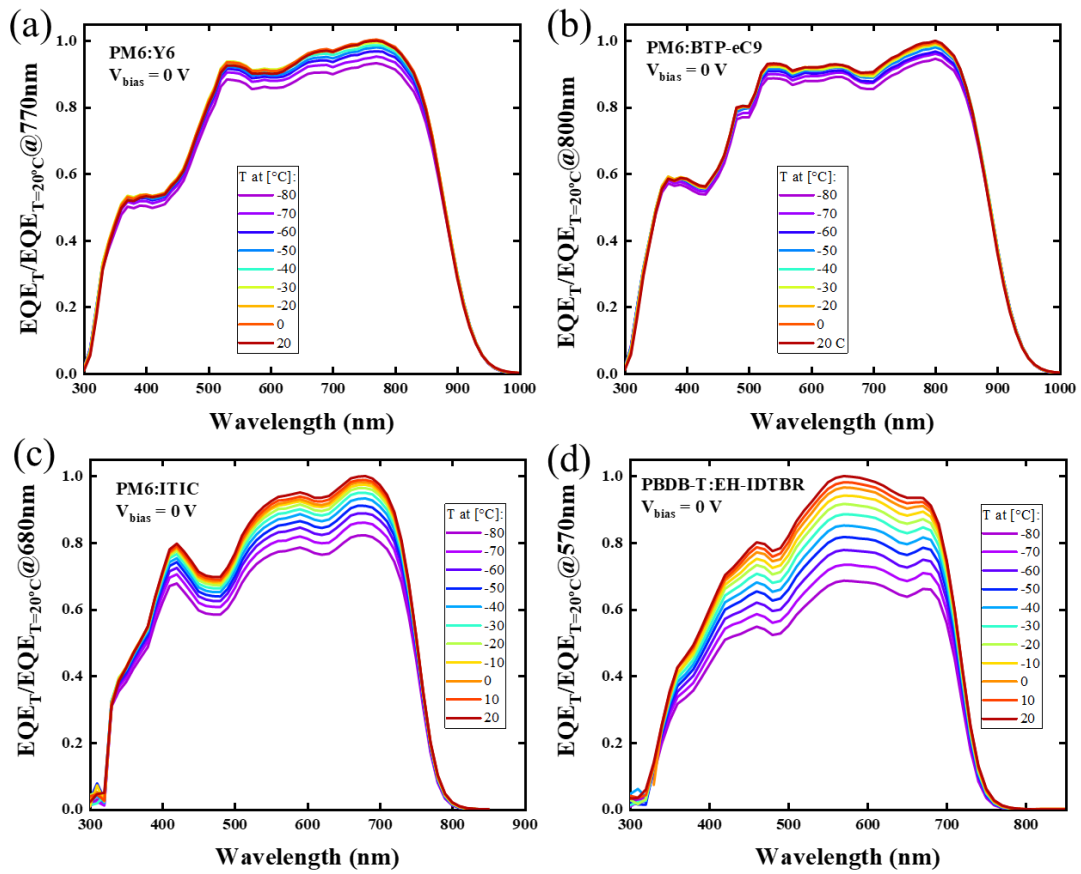

**Figure S2** Temperature dependent EQE spectra of  $\sim 100$  nm thick (a) PM6:Y6, (b) PM6:BTP-eC9, (c) PM6:ITIC and (d) PBDB-T:EH-IDTBR solar cells. The EQEs are normalised to the EQE measured at 20°C.

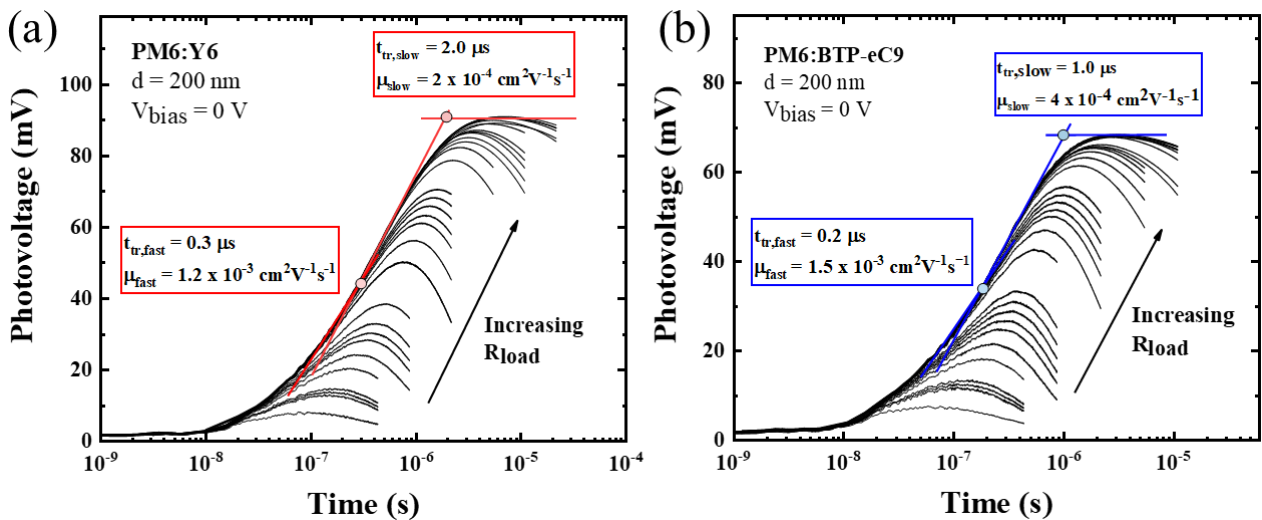

**Figure S3** Resistance dependent photovoltage (RPV) transients of (a) PM6:Y6 and (b) PM6:BTP-eC9 devices. The fast and slow mobilities are quantified from their corresponding transit times ( $t_{tr}$ ) shown in the Figures assuming built-in voltages of  $V_{bi} = 1.1$  V for both PM6:Y6 and PM6:BTP-eC9.

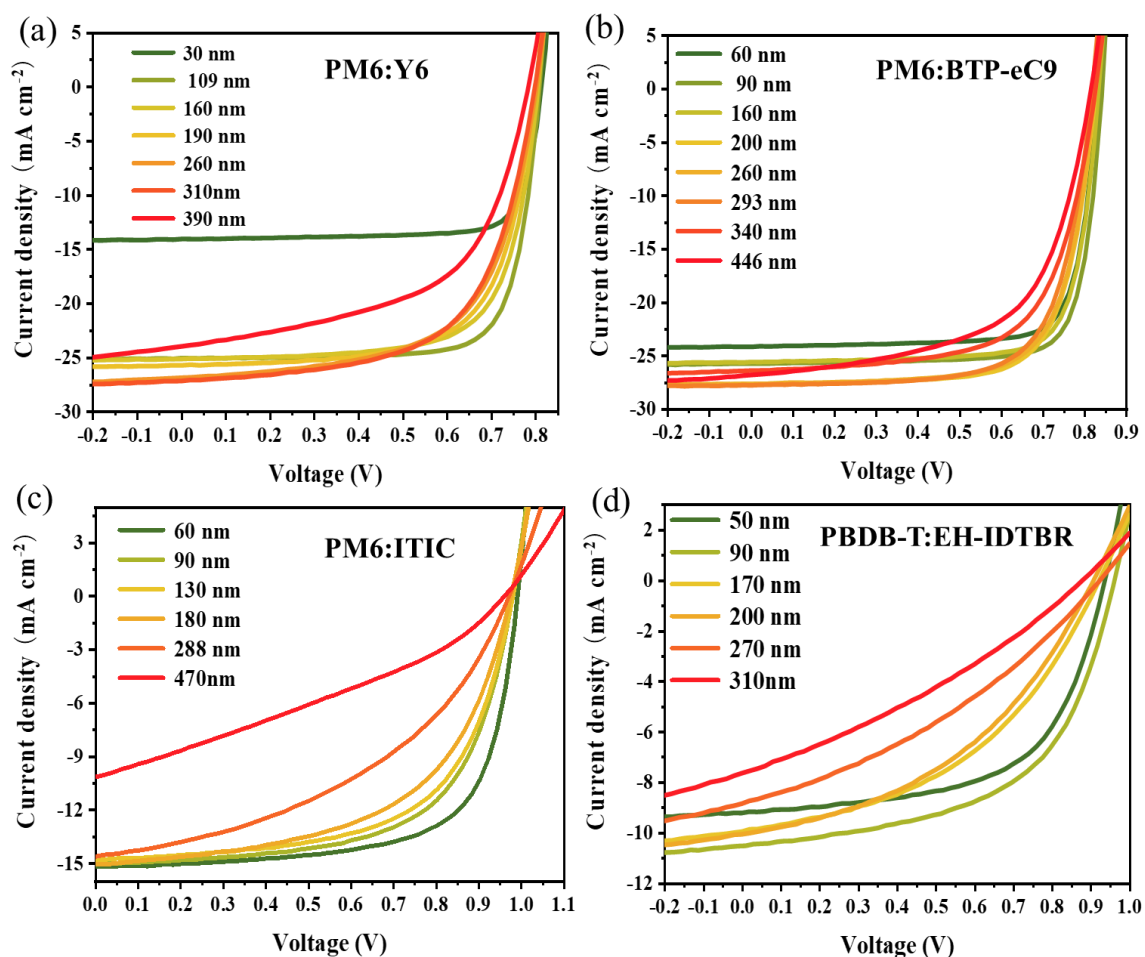

**Figure S4** Current density versus voltage characteristics of (a) PM6:Y6, (b) PM6:BTP-eC9, (c) PM6:ITIC, and (d) PBDB-T:EH-IDTBR solar cells under artificial 1 sun AM1.5G illumination.

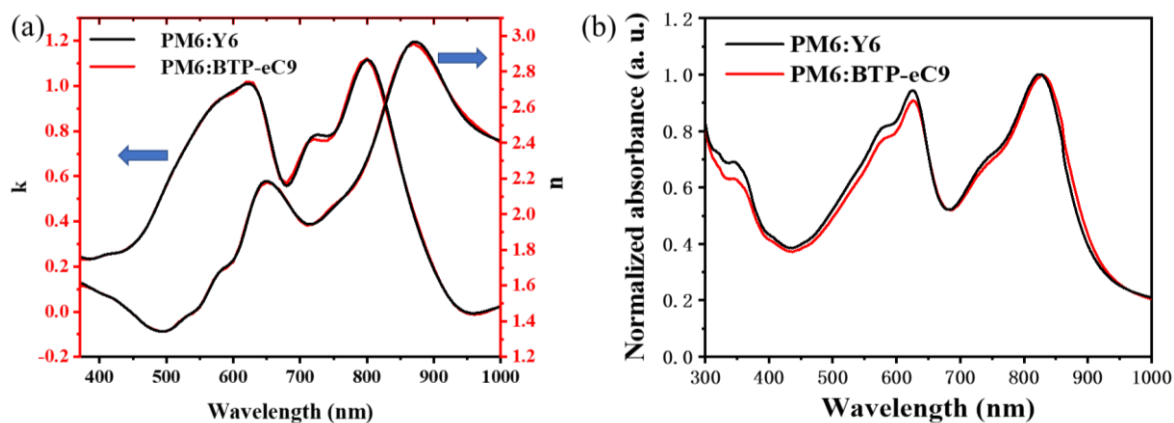

**Figure S5** (a) Extinction coefficient and refractive index of PM6:Y6 and PM6:BTP-eC9 obtained *via* ellipsometry plotted as a function of wavelength. (b) Normalized absorbance of PM6:Y6 and PM6:BTP-eC9 films on glass.

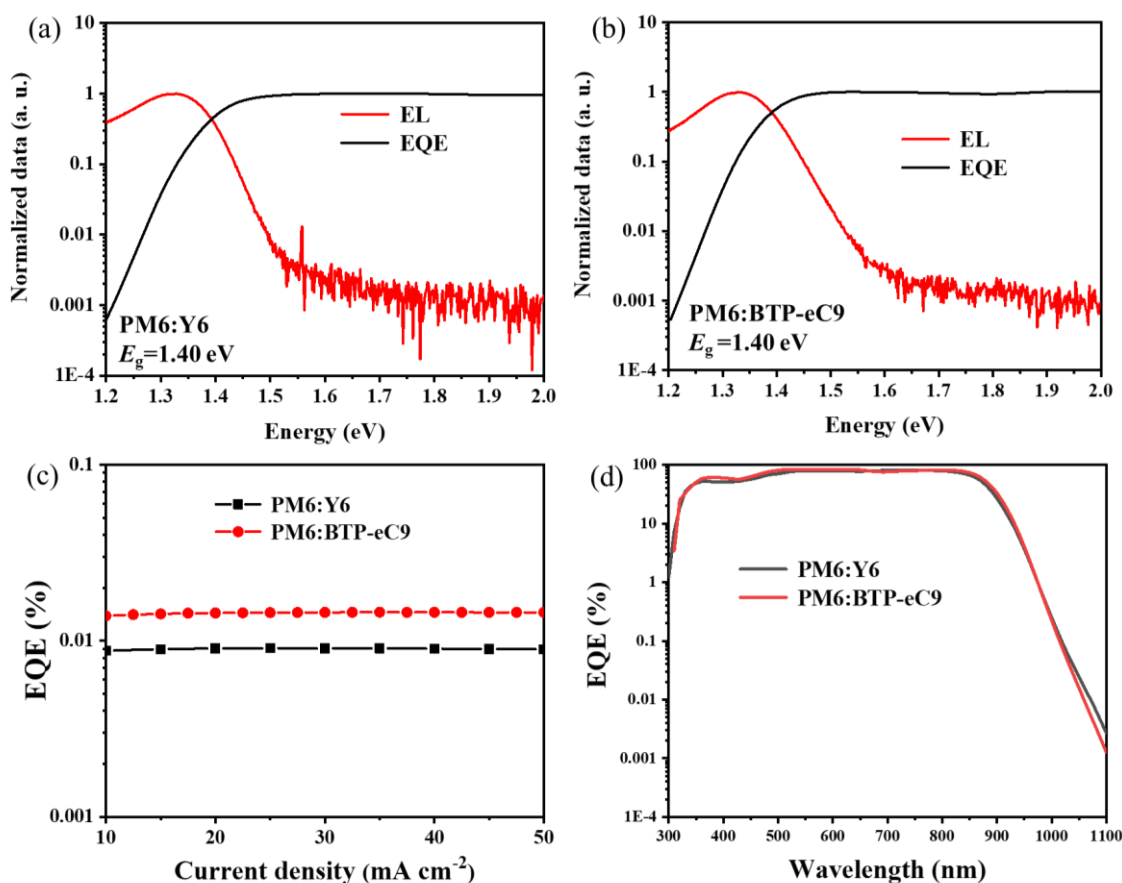

**Figure S6** Normalized external quantum efficiency (EQE) and electroluminescence (EL) spectra of (a) PM6:Y6 and (b) PM6:BTP-eC9 device. The crossing point of EQE and EL spectra marks the optical gap  $E_g$ . (c) Electroluminescent external quantum efficiency (EQE<sub>EL</sub>) of a PM6:Y6 and PM6:BTP-eC9 device plotted as a function of applied current density. (d) EQE spectra of 100 nm thick PM6:Y6 and PM6:BTP-eC9 devices, respectively.

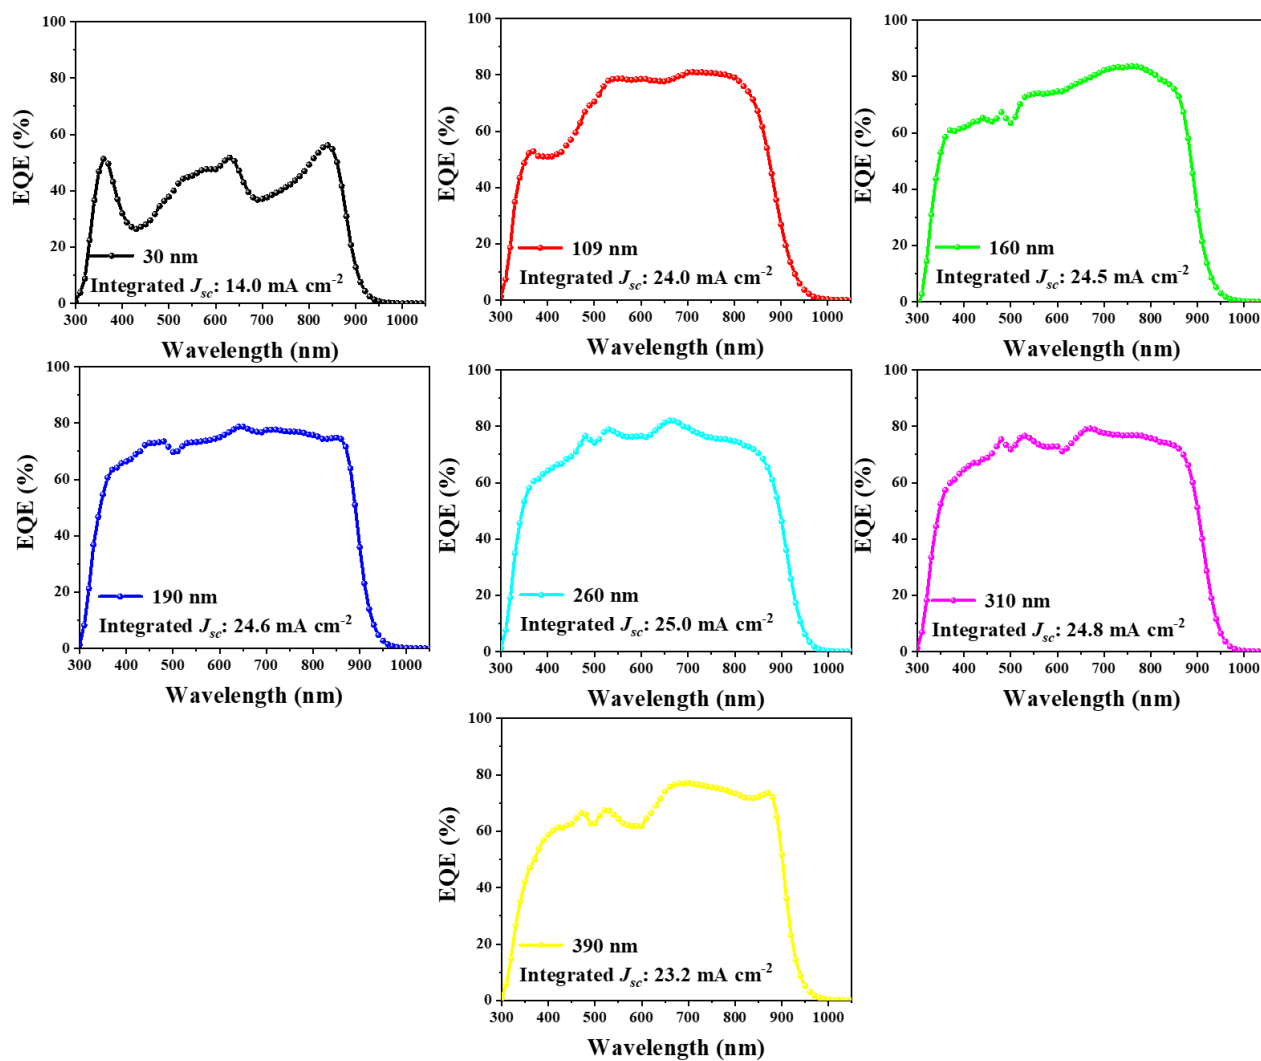

**Figure S7** External quantum efficiency (EQE) spectra of PM6:Y6 devices for various active layer thicknesses. The integrated  $J_{sc}$  from EQE are shown in the insets.



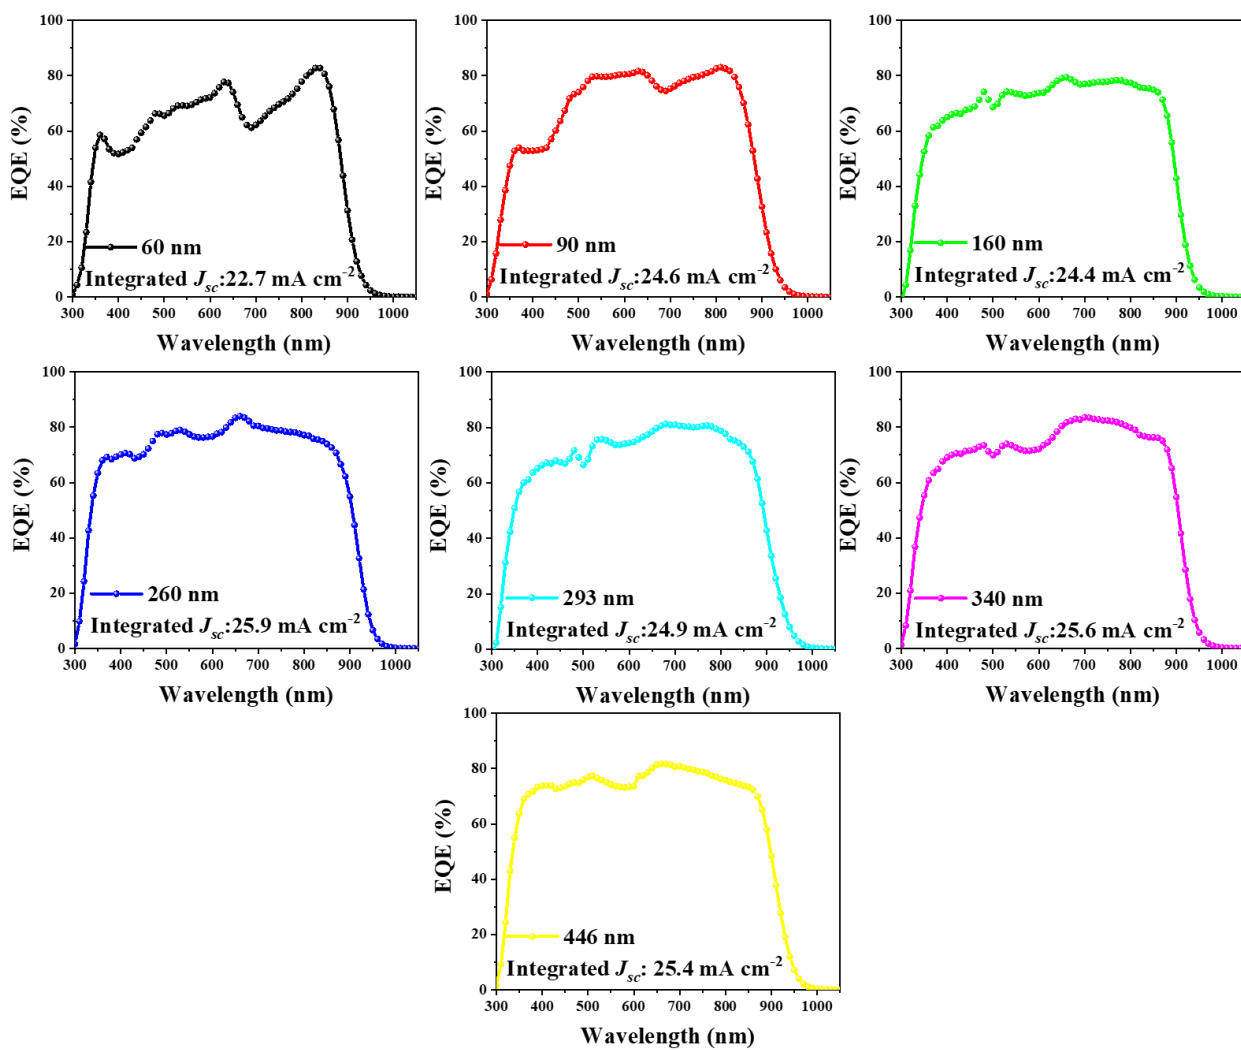

**Figure S8** External quantum efficiency (EQE) spectra of PM6:BTP-eC9 for different active layer thicknesses. The integrated  $J_{sc}$  from EQE are shown in the insets.

- Experimental PM6:BTP-eC9
- Experimental PM6:Y6
- Simulated PM6:BTP-eC9
- Simulated PM6:Y6

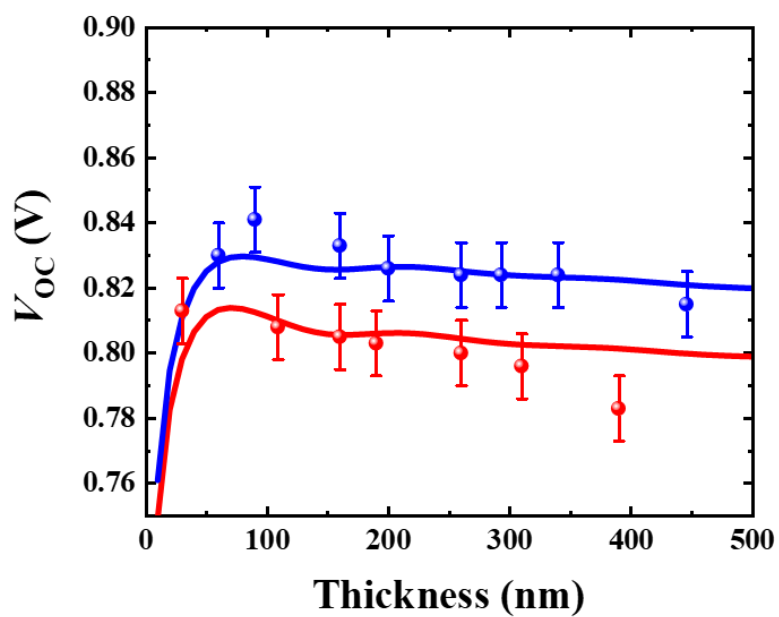

**Figure S9**  $V_{oc}$  of PM6:Y6 (red) and PM6:BTP-eC9 (blue) thickness dependent OSCs. Symbols are experimental data and solid lines correspond to drift-diffusion (DD) simulations. The corresponding DD device model parameters are provided in **Table S5**.

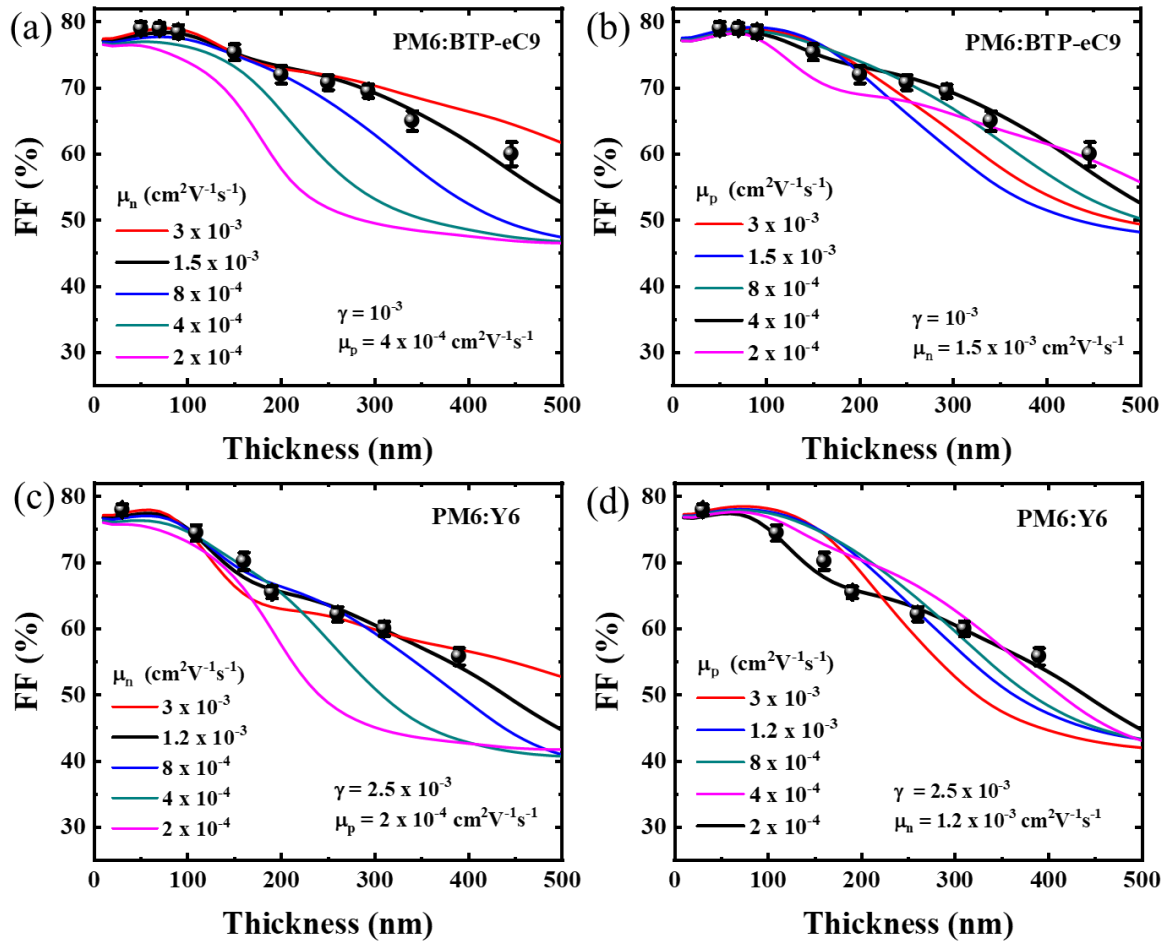

**Figure S10** Experimentally obtained Fill Factors (FFs) (symbols) of PM6:BTP-eC9 devices plotted as a function of active layer thickness and compared with DD simulations (solid lines) assuming different (a) electron mobilities and (b) hole mobilities. (c) and (d) are repetitions of panels (a) and (b) but for PM6:Y6. Unless otherwise stated the input parameters provided in **Table S6** are used in the simulations.

**Tables:****Table S1** Photovoltaic parameters of PM6:Y6 devices with different active layer thicknesses.

| Thickness (nm) | FF   | $J_{sc}$               | $V_{oc}$ | PCE <sub>max</sub> (PCE <sub>avg</sub> ) |
|----------------|------|------------------------|----------|------------------------------------------|
|                | [%]  | [mA cm <sup>-2</sup> ] | [V]      | [%]                                      |
| 30 nm          | 78.9 | 14.1                   | 0.81     | 9.1 (8.7±0.4)                            |
| 109 nm         | 76.6 | 25.1                   | 0.81     | 15.6 (15.2±0.4)                          |
| 160 nm         | 70.4 | 25.2                   | 0.81     | 14.3(13.9±0.4)                           |
| 190 nm         | 65.3 | 25.4                   | 0.80     | 13.4 (13.2±0.2)                          |
| 260 nm         | 61.9 | 26.7                   | 0.80     | 13.2 (12.8±0.4)                          |
| 310 nm         | 61.4 | 26.8                   | 0.80     | 13.1 (12.6±0.5)                          |
| 390 nm         | 55.7 | 23.9                   | 0.78     | 10.5 (9.3±1.2)                           |

**Table S2** Photovoltaic parameters of PM6:BTP-eC9 devices with different active layer thicknesses.

| Thickness (nm) | FF   | $J_{sc}$               | $V_{oc}$ | PCE <sub>max</sub> (PCE <sub>avg</sub> ) |
|----------------|------|------------------------|----------|------------------------------------------|
|                | [%]  | [mA cm <sup>-2</sup> ] | [V]      | [%]                                      |
| 60 nm          | 78.5 | 24.1                   | 0.83     | 15.7 (15.3±0.4)                          |
| 90 nm          | 79.1 | 25.7                   | 0.84     | 17.1 (16.7±0.2)                          |
| 160 nm         | 76.9 | 25.6                   | 0.83     | 16.4 (16.2±0.2)                          |
| 200 nm         | 72.3 | 27.7                   | 0.83     | 16.5 (16.1±0.3)                          |
| 260 nm         | 71.8 | 27.8                   | 0.82     | 16.4 (15.9±0.3)                          |
| 293 nm         | 71.3 | 27.7                   | 0.82     | 16.2 (15.7±0.4)                          |
| 340 nm         | 66.1 | 27.2                   | 0.82     | 14.8 (14.3±0.5)                          |
| 446 nm         | 59.9 | 26.8                   | 0.82     | 13.1 (12.4±0.7)                          |

**Table S3** Photovoltaic parameters of PM6:ITIC devices with different active layer thicknesses.

| Thickness (nm) | FF   | $J_{sc}$               | $V_{oc}$ | PCE <sub>max</sub> (PCE <sub>avg</sub> ) |
|----------------|------|------------------------|----------|------------------------------------------|
|                | [%]  | [mA cm <sup>-2</sup> ] | [V]      | [%]                                      |
| 60 nm          | 68.6 | 15.1                   | 0.99     | 10.3 (9.9±0.3)                           |
| 90 nm          | 63.0 | 15.0                   | 0.98     | 9.3 (9.0±0.2)                            |
| 130 nm         | 61.1 | 14.6                   | 0.98     | 8.9 (8.6±0.3)                            |
| 180 nm         | 55.6 | 15.0                   | 0.98     | 8.2 (8.0±0.2)                            |
| 288 nm         | 43.8 | 14.5                   | 0.97     | 6.2 (5.7±0.3)                            |
| 470 nm         | 32.0 | 10.1                   | 0.96     | 3.1 (2.8±0.2)                            |

**Table S4** Photovoltaic parameters of PBDB-T:EH-IDTBR devices with different active layer thicknesses.

| Thickness (nm) | FF   | $J_{sc}$               | $V_{oc}$ | PCE <sub>max</sub> (PCE <sub>avg</sub> ) |
|----------------|------|------------------------|----------|------------------------------------------|
|                | [%]  | [mA cm <sup>-2</sup> ] | [V]      | [%]                                      |
| 50 nm          | 59.8 | 9.1                    | 0.94     | 5.1 (4.8±0.3)                            |
| 90 nm          | 55.5 | 10.4                   | 0.96     | 5.6 (5.3±0.3)                            |
| 170 nm         | 44.3 | 10.0                   | 0.92     | 4.1(3.8±0.3)                             |
| 200 nm         | 42.3 | 10.1                   | 0.91     | 3.9 (3.6±0.3)                            |
| 270 nm         | 34.8 | 8.8                    | 0.92     | 2.8 (2.9±0.2)                            |
| 310nm          | 31.7 | 7.6                    | 0.88     | 2.1(1.9±0.2)                             |

**Table S5** Energy loss analysis of PM6:Y6 and PM6:BTP-eC9 devices with the active layer thickness of around 100 nm.

|             | PCE (%) | FF (%) | $J_{sc}$ (mA cm <sup>-2</sup> ) | $V_{oc}$ (V) | $E_g$ (eV) | $V_{oc}$ Loss (V) | $V_{oc\_R}$ (V) | $\Delta V_{oc\_NR@}$ EQEPV (V) | $\Delta V_{oc\_NR@}$ EQEEL (V) |
|-------------|---------|--------|---------------------------------|--------------|------------|-------------------|-----------------|--------------------------------|--------------------------------|
| PM6:Y6      | 15.3    | 74.0   | 25.1                            | 0.82         | 1.39       | 0.57              | 1.08            | 0.25                           | 0.24                           |
| PM6:BTP-eC9 | 16.7    | 77.8   | 25.5                            | 0.84         | 1.39       | 0.55              | 1.08            | 0.24                           | 0.23                           |

**Table S6** Input parameters for the electro-optical device simulations.

| Parameter                                               | Unit                | PM6:Y6               | PM6:BTP-eC9          |
|---------------------------------------------------------|---------------------|----------------------|----------------------|
| Temperature, $T$                                        | K                   | 300                  | 300                  |
| Relative permittivity, $\epsilon$                       | -                   | 3.4                  | 3.4                  |
| Electron mobility, $\mu_n$                              | cm <sup>2</sup> /Vs | $1.2 \times 10^{-3}$ | $1.5 \times 10^{-3}$ |
| Hole mobility, $\mu_p$                                  | cm <sup>2</sup> /Vs | $2 \times 10^{-4}$   | $4 \times 10^{-4}$   |
| Langevin reduction factor, $\gamma$                     | -                   | $2.5 \times 10^{-3}$ | $10^{-3}$            |
| Electrical bandgap, $E_{g,DA}$                          | eV                  | 1.22                 | 1.24                 |
| Built-in voltage, $V_{bi}$                              | V                   | 1.02                 | 1.04                 |
| Effective density of states, $N_{c,v}$                  | cm <sup>-3</sup>    | $10^{20}$            | $10^{20}$            |
| Injection barrier for majority carriers at the contacts | eV                  | 0.1                  | 0.1                  |
